# Supplementary material
Source: publisher site journal article supplement (https://www.dovepress.com/get_supplementary_file.php?f=311577.docx)
Supplement: Supplementary file 1 [file get_supplementary_file.php]

**Supporting information**

# Hyaluronic Acid Coated Liposomes Co-Delivery of Natural Cyclic Peptide RA-XII and Mitochondrial Targeted Photosensitizer for Highly Selective Precise Combined Treatment of Colon Cancer

Yanqing Xu,# Yongrong Yao,# Linxiao Wang, Huachao Chen,* Ninghua Tan*

State Key Laboratory of Natural Medicines, School of Traditional Chinese Pharmacy, China Pharmaceutical University, Nanjing 211198, P. R. China

#These authors contributed equally to this work

Correspondence: Ninghua Tan; Huachao Chen

State Key Laboratory of Natural Medicines, School of Traditional Chinese Pharmacy, China Pharmaceutical University, Nanjing, 211198, PR China;

Tel/Fax +86 25 86185772

Email [nhtan@cpu.edu.cn](mailto:nhtan@cpu.edu.cn); huachao.chen@cpu.edu.cn


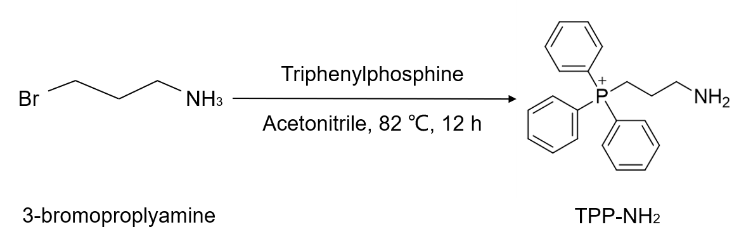
(a) Synthesis of TPP-NH2

(b) Synthesis of TPPP





**Fig. S1** Structure and synthetic routes for TPPP. (a) TPP-NH2 (3-aminopropyl)triphenylphosphonium was synthesized by substitution of bromine in 3-bromopropylamine with triphenylphosphine. (b) Synthesis scheme for the preparation of TPPP.

(a)

**
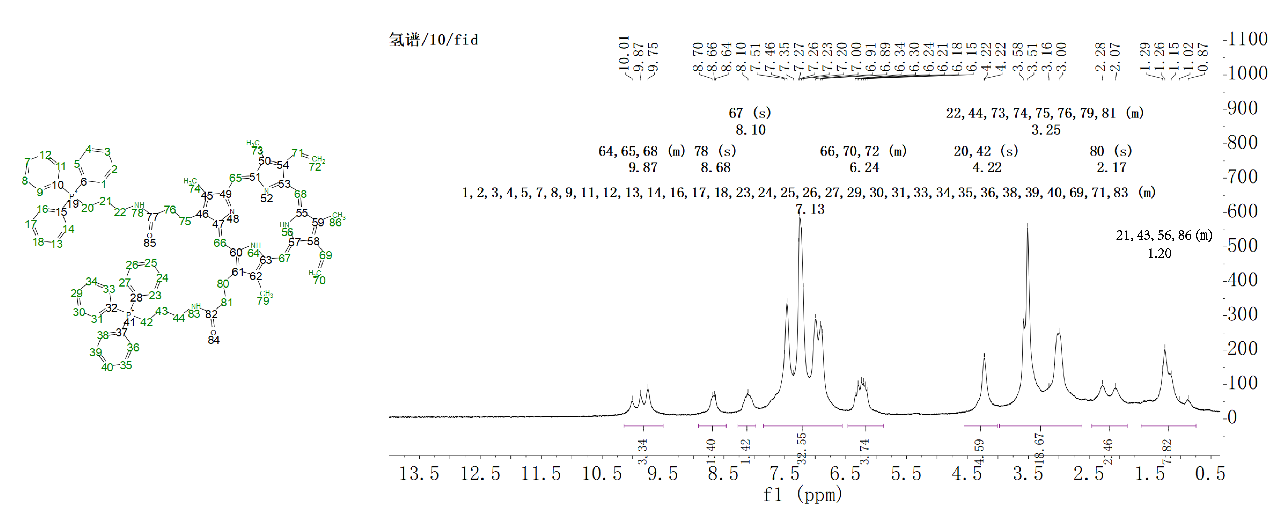
**

(b)
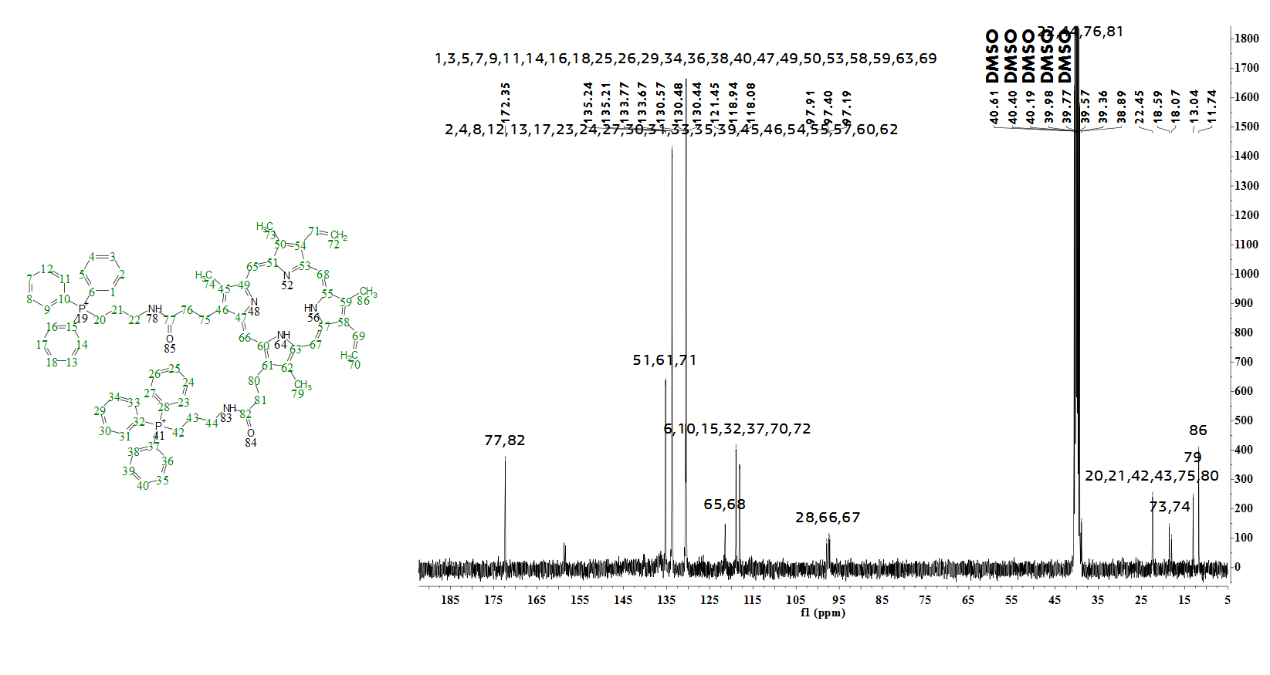


(c)


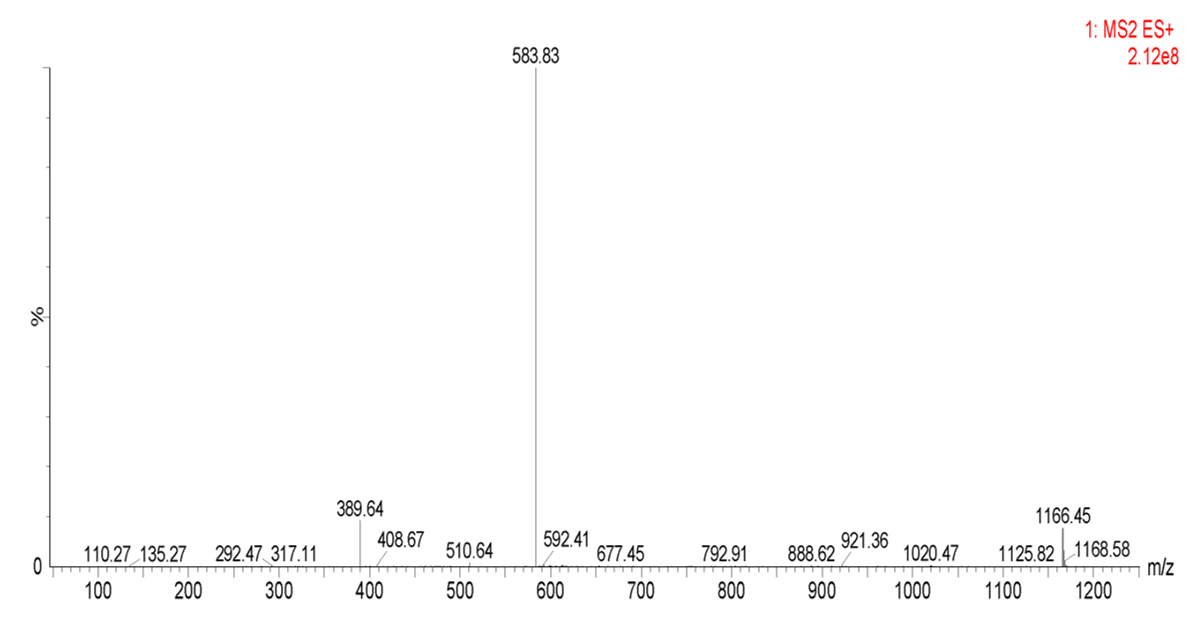


**Fig. S2** (a) The 1H NMR spectrum of TPPP. (b) The 13C NMR spectrum of TPPP. (c) The MS spectrum of TPPP.

**
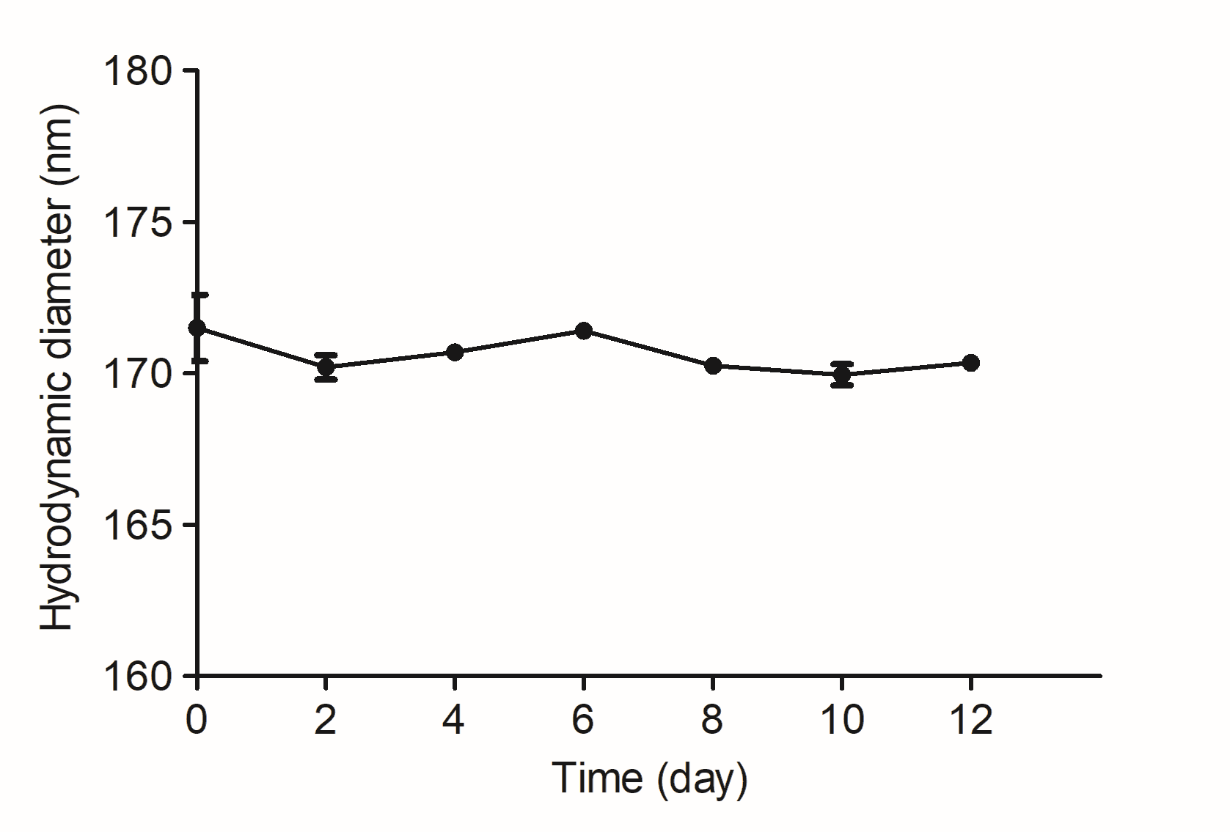
**

**Fig. S3** Long-term-stability study of RA/TPPP-Lip in 10% PBS.

**
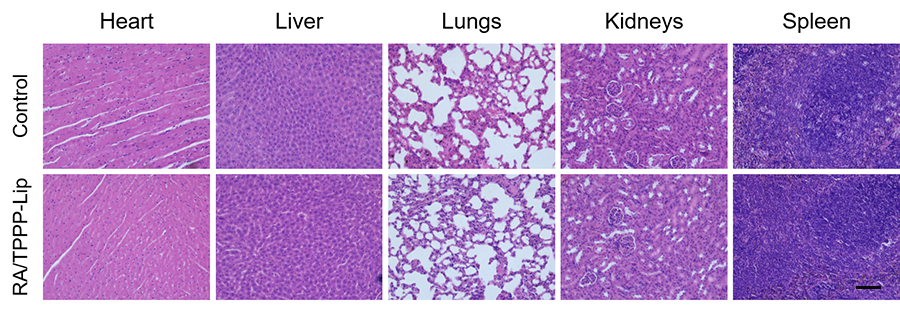
**

**Fig. S4** H&E staining images of tissue sections from different organs of mice after RA/TPPP-Lip-mediated therapy and the age-match healthy mice without treatment (control). Scale bars: 100 μm.
